# Supplementary material for: An effective solution to simultaneously analyze size, mass and number concentration of polydisperse nanoplastics in a biological matrix: asymmetrical flow field fractionation coupled with a diode array detector and multiangle light scattering
Source: Royal Society of Chemistry journal article supplement (doi:10.1039/d1ra00450f), 2021-01-01
Supplement: d1ra00450f1.pdf [file d1ra00450f1.pdf]

1                                   **Electronic Supplementary Information**  
2                   **An effective solution to simultaneously analyze size, mass and number**  
3 **concentration of polydisperse nanoplastics in biological matrix: asymmetrical flow**  
4 **field fractionation coupled with diode array detector and multiangle light**  
5                                   **scattering**

6 *Xing-ling Luo<sup>a</sup>, Ying-ting Wu<sup>b</sup>, Ling-Yan Zhang<sup>a</sup>, Ke-xin Li<sup>a</sup>, Tian-jiang Jia<sup>a</sup>, Yi Chen<sup>c</sup>, Li-hong zhou<sup>a</sup>, Pei-li Huang<sup>a\*</sup>*

7 a School of Public Health, Capital Medical University, Beijing 100069, China.

8 b Core facility Center, Capital Medical University, Beijing 100069, China.

9 c School of Basic Medical Sciences, Capital Medical University, Beijing 100069, China.

10 \*Corresponding Author :

11 Peili Huang: [huangpl@ccmu.edu.cn](mailto:huangpl@ccmu.edu.cn); Tel.: +86 10 83916539; Fax: +86 10 83911507

## 13 Table of Contents

|    |                                                                                                   |    |
|----|---------------------------------------------------------------------------------------------------|----|
| 14 | <b>Experimental Section</b> .....                                                                 | 3  |
| 15 | <b>1. Materials and reagents</b> .....                                                            | 3  |
| 16 | <b>2. Characterization of PS NPs by Dynamic light scatterer (DLS) and Transmission electron</b>   |    |
| 17 | <b>microscope (TEM).</b> .....                                                                    | 3  |
| 18 | <b>3. Asymmetrical flow field fractionation-diode array detector-multiangle light scattering</b>  |    |
| 19 | <b>detector (AF4-DAD-MALS).</b> .....                                                             | 3  |
| 20 | <b>4. Optimization of sample pretreatment for biological samples.</b> .....                       | 4  |
| 21 | <b>5. Analysis of polydisperse PS NPs by AF4-DAD-MALS in the whole blood system of rats. </b> ..  | 4  |
| 22 | <b>Figures</b> .....                                                                              | 5  |
| 23 | <b>Figure S1.</b> The fractogram of five monodisperse PS NPs using ultrapure water as a carrier   |    |
| 24 | fluid.....                                                                                        | 5  |
| 25 | <b>Figure S2.</b> The blank fractogram (A) and UV signal (B) using different carrier fluids ..... | 6  |
| 26 | <b>Figure S3.</b> The fractogram of polydispersed PS NPs using different concentration of carrier |    |
| 27 | fluids .....                                                                                      | 8  |
| 28 | <b>Figure S4.</b> The fractogram of five PS NPs at different AF4 parameters .....                 | 10 |
| 29 | <b>Figure S5.</b> The original and normalized UV peak areas of five PS NPs ( $n=3$ ) .....        | 11 |
| 30 | <b>Figure S6.</b> Five PS NPs after AF4 separation and the mixture solution composed by five PS   |    |
| 31 | NPs detected by TEM.....                                                                          | 12 |
| 32 | <b>Figure S7.</b> The linearity of the total number versus the mass of PS NPs .....               | 13 |
| 33 | <b>Figure S8.</b> The fractogram of five PS NPs after using various pretreatment methods. ....    | 15 |
| 34 | <b>Figure S9.</b> Relative frequency of PS NPs radius obtained on aqueous solution (black) and    |    |
| 35 | serum solution (red) .....                                                                        | 15 |
| 36 | <b>Figure S10.</b> The application of AF4-DAD-MALS in the whole blood sample.....                 | 16 |
| 37 | <b>Tables</b> .....                                                                               | 17 |
| 38 | <b>Table S1.</b> The characterization of PS NPs by MALS .....                                     | 17 |
| 39 | <b>Table S2.</b> The eluted program of AF4 for five PS NPs .....                                  | 18 |
| 40 | <b>Table S3.</b> The mass and total number particles of PS NPs in biological fluid .....          | 19 |
| 41 |                                                                                                   |    |

## 43 **Experimental Section**

### 44 **1. Materials and reagents**

45 Five sizes of polystyrene NPs (30, 60, 100, 200, 500 nm) successively abbreviated as PS 30 nm, PS 60 nm, PS  
46 100 nm, PS 200 nm, and PS 500 nm at a mass concentration of 40  $\mu\text{g}/\mu\text{L}$  were purchased from Thermo Fischer  
47 Scientific (Waltham, MA, USA), and stored in the refrigerator at 4 °C. Ultrapure water (resistivity 18.2 M $\Omega$ /cm)  
48 was collected using a Millipore water purification system (Billerica, MA) and used in all experiments.  
49 Chromatographic grade methanol and FL-70 were acquired from Fisher (Ohio, USA). Bovine serum albumin (BSA),  
50 human serum albumin (HSA) and sodium dodecyl sulfate (SDS) were purchased from Sigma-Aldrich (St. Louis, MO,  
51 USA). Millipore precut regenerated cellulose (RC) membranes with a molecular weight cut-off of 10 kDa and red  
52 casein were supplied by Wyatt Technology (Wyatt Technology, USA). Normal rat serum was purchased from  
53 Applygen Technologies Inc. (Beijing, China). Sodium chloride (NaCl) was obtained from Beijing Chemical Plant  
54 (Beijing, China).

### 55 **2. Characterization of PS NPs by Dynamic light scatterer (DLS) and Transmission electron microscope** 56 **(TEM).**

57 The size of PS NPs was determined using a Zetasizer Nano ZS90 (Malvern Instruments Ltd., Germany) at 25  
58 °C in triplicate. Specially, 1  $\mu\text{L}$  monodisperse PS NPs standard solution or PS NPs mixture standard composed by  
59 five PS NPs was diluted 1000 times and directly detected by DLS. For TEM analysis, 10  $\mu\text{L}$  of sample solutions  
60 were drop-cast on a formvar-coated copper grid and dried in a 37 °C thermostatic tank overnight. TEM of the PS NPs  
61 was performed with a JEM-2100 (JEOL, Japan). The fractions (F1-F5) after AF4 separation were collected and  
62 detected using DLS and TEM mentioned above.

### 63 **3. Asymmetrical flow field fractionation-diode array detector-multiangle light scattering detector (AF4-** 64 **DAD-MALS).**

65 AF4 measurements were performed using an Eclipse Dual tech system (Wyatt Technology, USA) coupled to  
66 a 1260 HPLC system (Agilent Technologies, Santa Clara, USA), which contains a quaternary pump, an online  
67 vacuum degasser, an autosampler and a DAD. To further ensure a particle-free carrier liquid entered into the AF4  
68 channel, a 0.1  $\mu\text{m}$  membrane filter was placed between the quaternary pump and AF4 channel. Separation of  
69 five PS NPs occurred in a trapezoidal-shaped channel which equipped with a 350  $\mu\text{m}$  spacer and an RC 10 kDa  
70 membrane as the accumulation wall. The concentrations of the five PS NPs were detected using an online DAD  
71 detector operating at 230 nm, while the radii and number of particles were monitored and calculated by using a  
72 Dawn Heleos II MALS detector operating at a wavelength of 658 nm. The calibration of the instrument was

73 performed with a 90° MALS detector using toluene, whereas the other detectors were normalized with BSA as an  
74 isotropic scattered standard.

75 To build good separation conditions for the five PS NPs, several carrier fluids, e.g., ultrapure water, 0.1 %  
76 (v/v) FL-70, SDS ranged from 0.001 - 0.05 % (m/v), NaCl, (NH<sub>4</sub>)<sub>2</sub>CO<sub>3</sub>, and PB in the range of 0.05 - 3.00 mM, were  
77 studied. Additionally, various initial velocities of the cross flow (at 0.5, 1.0, 2.0 and 3.0 mL/min), elution modes  
78 (constant, linear, exponential), and slopes (namely, how quickly the cross flow dropped to 0.1 mL/min; tested  
79 conditions: a decrease in the flow rate from 1.0 to 0.1 mL/min within 20, 30, 40 and 50 min), detector (light  
80 scattering, LS) flows (0.3, 0.5, 0.8, 1.0 mL/min), focusing flow rates (0.5, 1.0, 2.0 mL/min) and focusing times (5,  
81 10, 20, 40 min), and pH values of solution in the range of 2-11 were carefully investigated. As a result, the carrier  
82 fluid (0.1 mM NaCl) was delivered into the AF4 channel by an HPLC pump and equilibrated for 1 h before sample  
83 injection. After that, a 20 µL mixed solution of the five PS NPs or sample was injected into the AF4 channel and  
84 separated using the optimum eluted program listed in Table S1 at a fixing LS flow rate of 0.5 mL/min.

#### 85 **4. Optimization of sample pretreatment for biological samples.**

86 Several pretreatment methods, including digestion methods using concentrated nitric acid (HNO<sub>3</sub>),  
87 potassium hydroxide (KOH), and hydrogen peroxide (H<sub>2</sub>O<sub>2</sub>) as digestion reagents, centrifugation, and  
88 ultrafiltration were selected to process biological sample. The influencing factors, e.g., the concentration (10 %,  
89 30 %, 50 % (w/v), saturation) of KOH and bathing temperature (60, 80, 100 °C) were investigated.

#### 90 **5. Analysis of polydisperse PS NPs by AF4-DAD-MALS in the whole blood system of rats.**

91 All animal experiments were performed in compliance with the institutional ethics committee regulations  
92 and guidelines on animal welfare with the approval of the Animal Experiments and Experimental Animal Welfare  
93 Committee of Capital Medical University (ethical review number: AEEI-2016-076). Male Wistar rats that weighed  
94 200–220 g were obtained from Beijing Vital River Laboratory Animal Technology Co., Ltd. (Beijing, China). The  
95 rats were housed under normal laboratory conditions with free access to standard rodent food and water. The  
96 rats were kept on a 12 h light/dark cycle. After acclimation, 3 male rats were selected as the experimental groups,  
97 and 3 male rats were treated as the control group. The experimental group was injected PS NPs mixture solution  
98 including 16 µg/µL PS 100 nm and 200 nm, and 8 µg/µL PS 500 nm through a tail vein. The control group was  
99 injected with an equal volume of normal saline in the same way. After the dosage, 0.2 mL blood samples were  
100 collected in a 0.6 mL centrifuge tube from the tail vein of the rat at three time points (5 min, 30 min, 1h, 2 h, 4h).  
101 The concentrations of PS NPs in the whole blood system were determined by AF4-DAD-MALS. The results were  
102 further analyzed by SPSS 19.0 software.

103 **Figures**

104 **1. The fractogram of five monodisperse PS NPs using ultrapure water as a carrier fluid**

105 The void peak and PS 30 nm peak merged together, while PS 60 nm, 100 nm, 200 nm and 500 nm were not  
106 completely separated using ultrapure water as a carrier fluid, indicating that five PS NPs partially overlapped.  
107 Therefore, it was not suitable to use ultrapure water as a carrier fluid for separating polydisperse PS NPs.

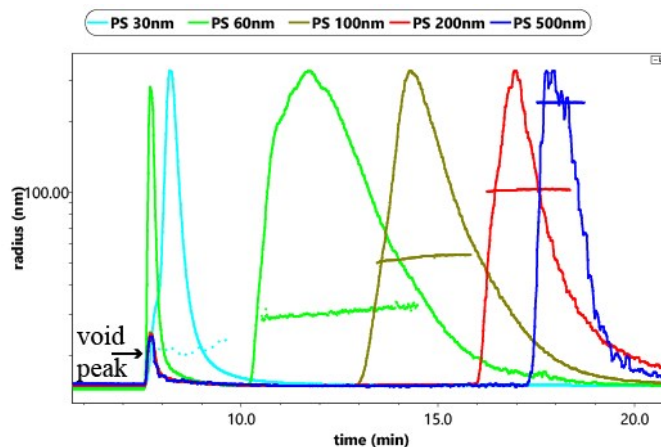

108

109

**Figure S1.** The fractogram of five monodisperse PS NPs using ultrapure water as a carrier fluid

111 **2. The blank fractogram using different carrier fluids.**

112 The MALS signal of blank sample showed highest noisy using SDS as a carrier fluid (Figure S2A), while the UV  
113 signal exhibited a high background by using FL-70 as a carrier fluid (Figure S2B). However, both MALS and UV  
114 signal showed low background noise using NaCl as a carrier fluid.

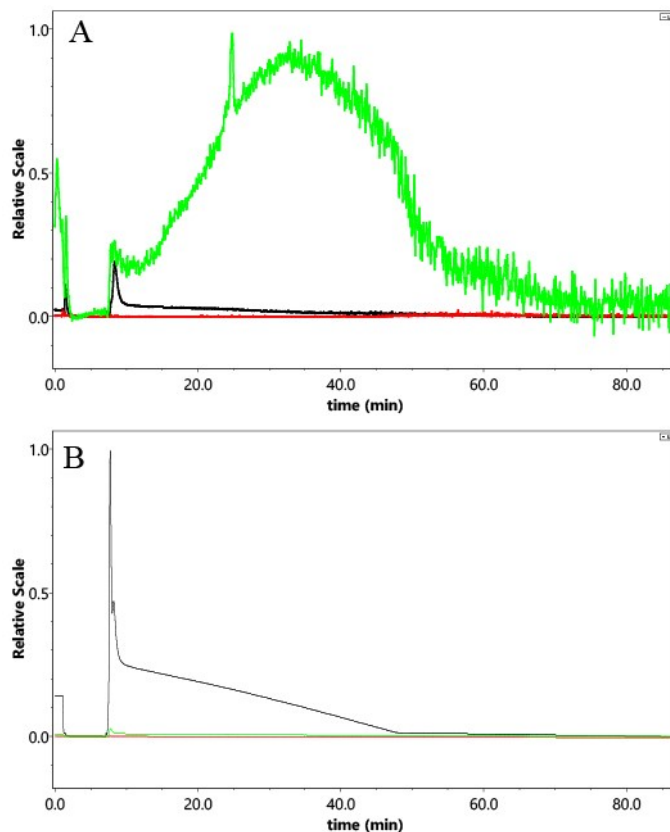

115

116 **Figure S2.** The blank fractogram (A) and UV signal (B) using different carrier fluids

117

(Black line: FL-70; Red line: NaCl; Green line: SDS )

119 **3. Optimization the optimum concentration of various carrier fluids for separating five PS NPs.**

120 With the concentration of carrier fluids increased, the resolutions among five PS NPs were improved (Figure  
121 S3). However, a baseline drift was observed since the concentration of SDS was greater than 0.03 % (*m/v*); and  
122 the signals were significantly declined or could not detect at the high concentration of salts used as carrier fluids (>  
123 3.00 mM in this study). Taking the resolution and recovery into comprehensive consideration, the optimum  
124 concentration of each carrier fluid was 0.005 % (*m/v*), 0.1 mM, 0.5 mM, 0.5 mM for SDS, NaCl, (NH<sub>4</sub>)<sub>2</sub>CO<sub>3</sub>, PB,  
125 respectively.

126 Two hypotheses could be applied to interpret this trend. For one, SDS as an anionic surfactant could form an  
127 instant and reversible “simultaneous two-site” adsorption like a bridge between the PS NPs particles and the RC  
128 membrane. To be specific, one end of SDS could adsorb on the surface of PS NPs, and the other end interacted  
129 with the surface of the membrane. Therefore, PS NPs was instantly adsorbed on the membrane surface, entailing  
130 a slowdown in the elution of the nanoparticles. As the concentration of SDS enhanced, the force of the “bridge”  
131 increased, so that the interaction between the PS NPs and membrane was gradually improved. Consequently,  
132 long elution time of particles with improved resolution and low peak areas were obtained with the added  
133 concentration of SDS. For another, NaCl, (NH<sub>4</sub>)<sub>2</sub>CO<sub>3</sub>, PB as salted carrier fluids, the compression of electrical  
134 double layers could be exploited to expound this phenomenon. Specifically, as the ionic strength increases, the  
135 electrical double layer particles were compressed inch by inch, resulting in a mild decrease in the PS NPs radii.  
136 With increasing NaCl, (NH<sub>4</sub>)<sub>2</sub>CO<sub>3</sub>, PB concentrations, the PS NPs was closer to the membrane surface and located  
137 at slower flow rate lines with the increased concentration of carrier fluid. Then, PS NPs would experience  
138 stronger attractive forces and be more likely to be absorbed by membrane. These results were consistent with t  
139 literature reports<sup>1</sup>.

140

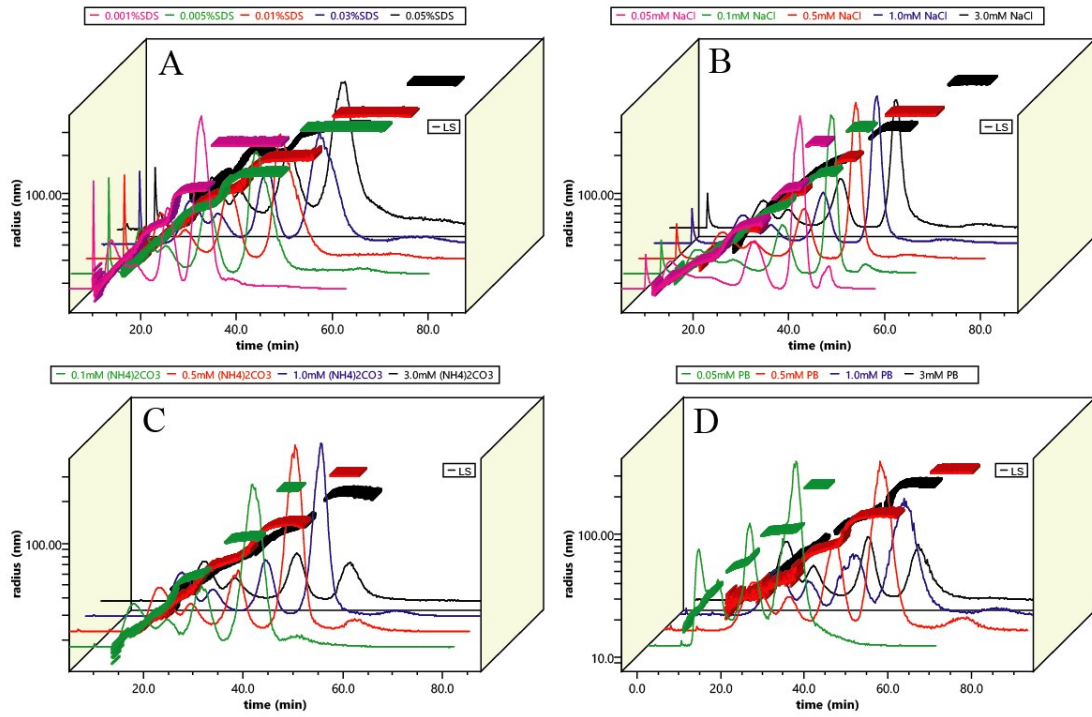

141

142

**Figure S3.** The fractogram of polydispersed PS NPs using different concentration of carrier fluids

143

(A: SDS, B: NaCl, C:  $(\text{NH}_4)_2\text{CO}_3$ , D: PB)



145 **4. The optimization of AF4 parameters for five PS NPs separation.**

146 The cross flow velocity remained constant at 1.0 mL/min (constant elution mode), PS 500 nm could not be  
147 eluted within 100 min, and burr peaks could be observed, while the resolution between PS 30 nm and PS 60 nm  
148 was less than 1.0 using the exponential elution mode (Figure S4A). Simultaneously, with an increase in the initial  
149 velocity of cross flow, the retention time of the five PS NPs was prolonged, and the peak shape became chunky,  
150 whereas the PS 30 nm peak was close to the void peak, and the resolution of PS 30 nm and 60 nm was less than  
151 1.0 by applying 0.5 mL/min as the initial cross flow velocity (Figure S4B). Furthermore, the cross flow velocity  
152 declined from 1.0 mL/min to 0.1 mL/min in 40 min, and the resolutions among the five PS NPs were larger than  
153 1.0 (Figure S4C). The signals of five PS NPs increased greatly, and the elution time was largely prolonged with a  
154 decrease in the LS flow (Figure S4D). However, previous research has predicted that extremely slow elution, e.g.,  
155 below 0.5 mL/min, would result in low recovery due to the immobilization of a significant quantity of the sample  
156 in the channel<sup>2</sup>. In other words, as the LS flow rate decreases, the analyte will be lost on the membrane, resulting  
157 in a low detection signal. The paradoxical phenomenon might relate to the dilution effect. Namely, more carrier  
158 fluid would be pumped into channel and the sample would be largely diluted using high LS flow velocity e.g. 1.0  
159 mL/min in comparison with low LS flow. If only the dilution effect caused signal difference, the signal obtained in  
160 various LS flows would be equal after normalization. To normalize the LS flow, the law of dilution was used  
161 according to equation:  $C1 \times V1 = C2 \times V2$  ( $C1$  and  $C2$  were original and normalized UV peak area, while  $V1$  and  
162  $V2$  were the original and normalized LS flow (1.0 mL/min was selected as the normalization LS flow in this study).  
163 As a result, the UV peak areas were similar in various LS flows after normalization for PS 30, 60, 100 and 200 nm,  
164 but showed a slightly increased trend with the increase of LS flow for PS 500 nm (Figure S5).

165 For the focus flow and time, no significant changes could be observed, except the void peak was reduced  
166 with the focus flow added, and the peak area slightly declined with the focus time increased (Figure S5E and S5F).  
167 To investigate the sample solution pH from 2 to 11, the five PS NPs could be separated and distinguished in  
168 general (Figure S5G). Consequently, the optimal cross flow parameter was an initial cross flow of 1.0 mL/min and  
169 a linear decrease to 0.1 mL/min in 40 min, the LS flow was fixed at 0.5 mL/min, and the focus flow and time were  
170 1.0 mL/min and 5 min, respectively. The sample pH was not required to control.

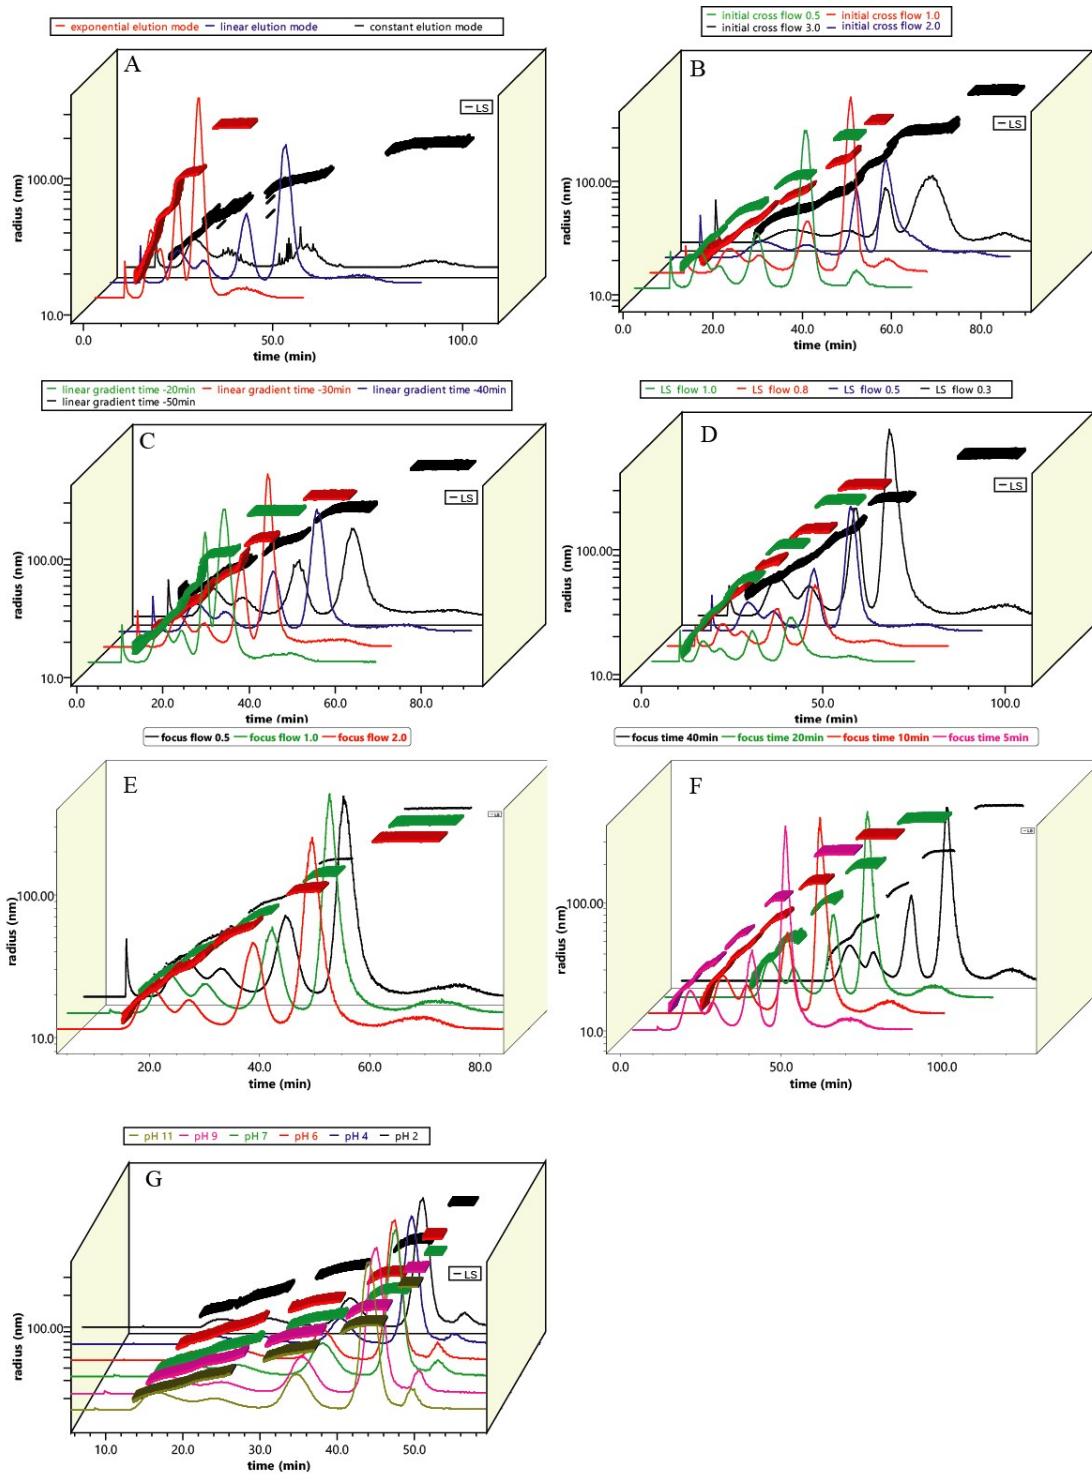

171

172

**Figure S4.** The fractogram of five PS NPs at different AF4 parameters

173

(A elution modes; B initial velocities of the cross flow; C slopes of the cross flow; D LS flows; E focus flow; F focus

174

times; G pH values of solution )

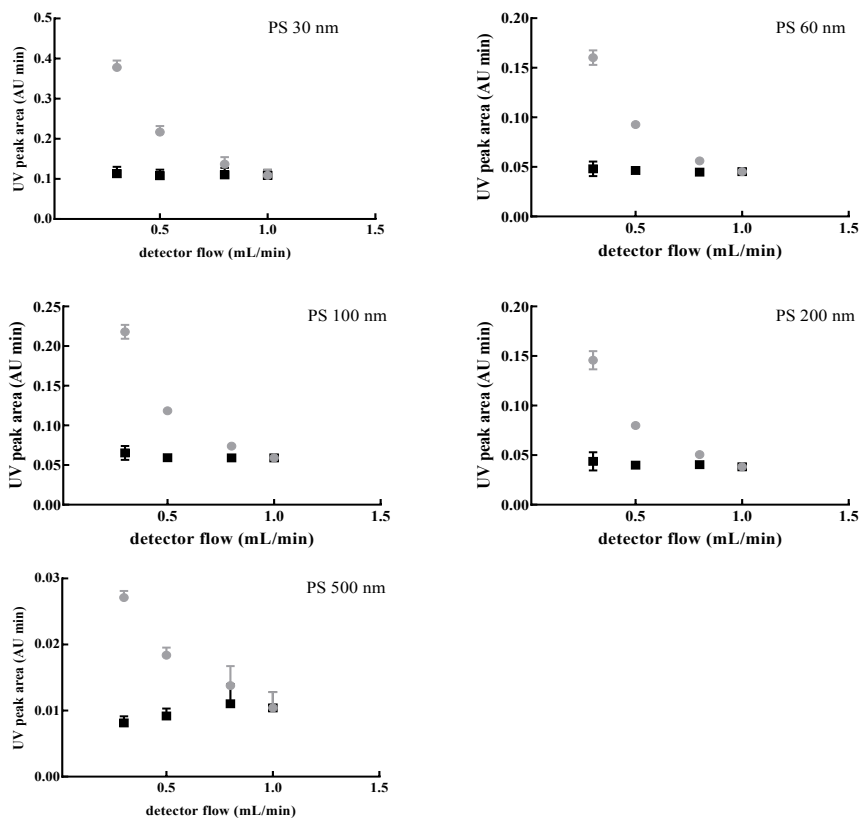

175

176

**Figure S5.** The original and normalized UV peak areas of five PS NPs ( $n=3$ )

177

(The grey circles represented the original UV peak of PS NPs, while the back squares were the normalized UV

178

peak of PS NPs)

180 **5. The characterization by TEM before and after AF4 separation**

181 After AF4 separation, the mixture solution composed by five PS NPs was separated to five fractions  
182 corresponding to PS 30 nm, 60 nm, 100 nm, 200 nm, 500 nm. The spherical and uniform particles involved each  
183 fraction could be observed after AF4 separation by TEM. However, differently sized PS NPs could be observed  
184 before AF4 separation

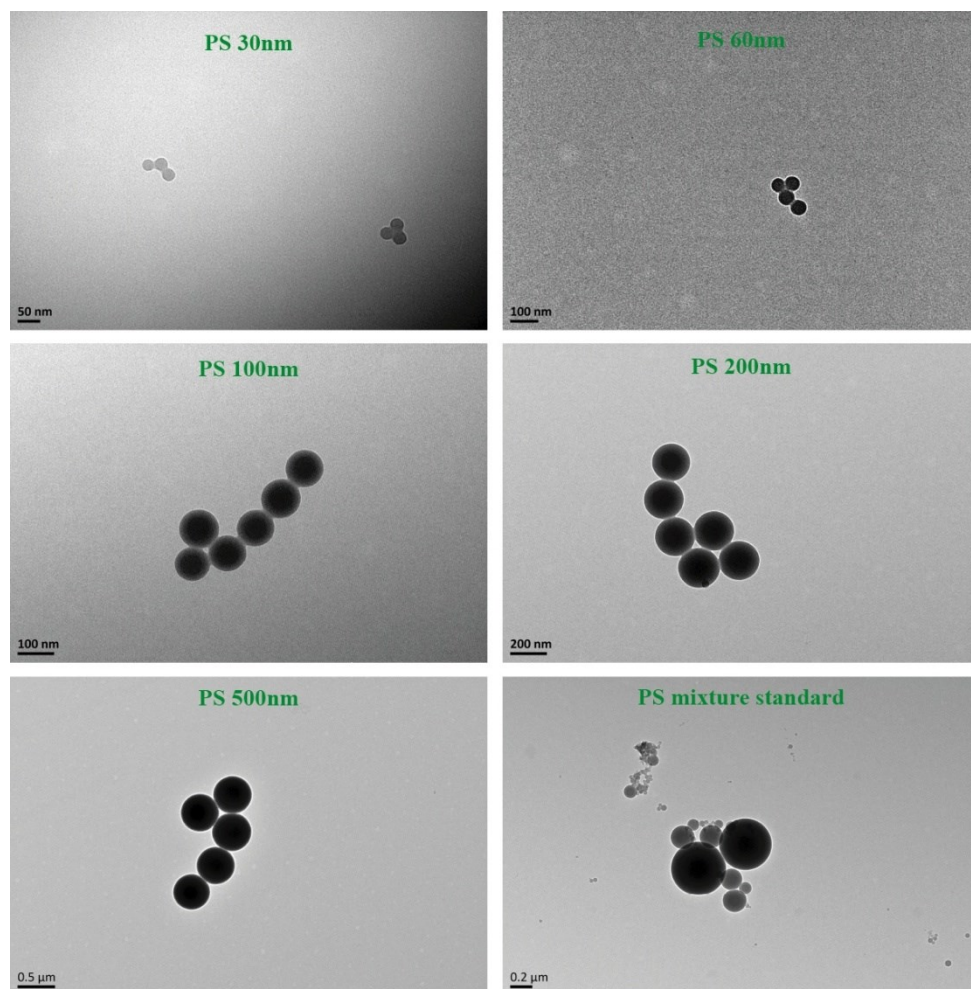

185  
186 **Figure S6.** Five PS NPs after AF4 separation and the mixture solution composed by five PS NPs detected by TEM.

188 **6. The relationship between the total number and mass of PS NPs.**

189 The total number versus the mass of PS NPs showed a good linearity ( $R^2 > 0.985$ ), suggesting that the total

190 number of particles is closely related to the mass of particles in the sample.

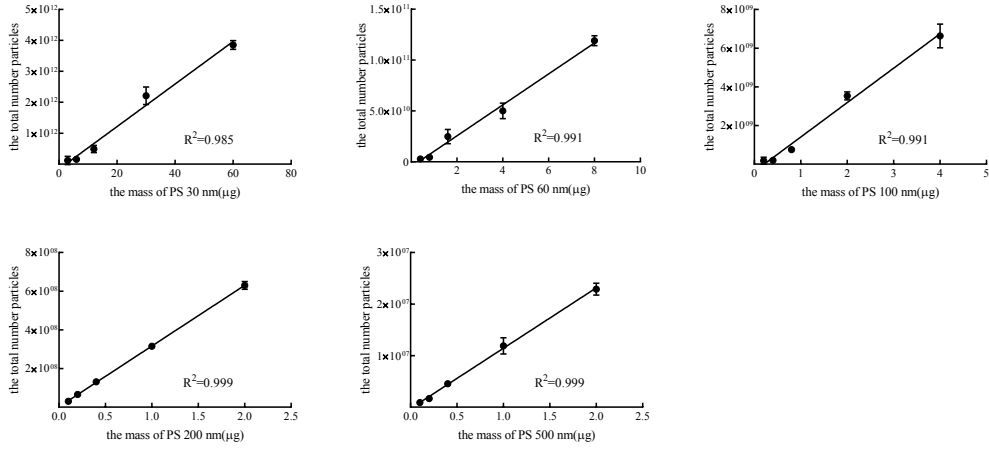

191

192

**Figure S7.** The linearity of the total number versus the mass of PS NPs

194 **7. Optimization of pretreatment for analyzing polydisperse PS NPs in the biosamples.**

195 For analyzing polydisperse NPI in biological samples, the crucial step is to screen a time- and cost-effective  
196 pretreatment method that efficiently reduces the impact of the biological matrices without degrading the NPI, as  
197 well as without affecting the subsequent use of the AF4-DAD-MALS method. In this study, the five of PS NPs in  
198 biological fluid could not be effectively separated and detected by AF4-DAD-MALS after using ultrafiltration, acid  
199 or peroxide digestion as pretreatment methods (Figure S8A), whereas the five PS NPs could be clearly observed  
200 and separated after centrifugation or alkali digestion (Figure S8B). Notwithstanding, centrifugation could greatly  
201 reduce the content of biological macromolecules, the low recovery of small particles such as PS 30 nm and PS 60  
202 nm (even though using high centrifugal force (20000 g)), the requirement of special instruments limited the  
203 centrifugation usage. Digestion method can also reduce biological macromolecules. However, HNO<sub>3</sub> possesses  
204 strong digestion ability and could directly digest and destroy both biological macromolecules and PS NPs, which  
205 reflected that no signal could be detected after acid digestion. Researchers had also reported that the recovery  
206 of PS 568 nm was only 1.4 % after HNO<sub>3</sub> digestion<sup>3</sup>. Simultaneously, dense foam was formed and spilled over the  
207 container after the addition of hydrogen peroxide, which hampered the filtration and further separation and  
208 detection of the samples. A similar phenomenon has been reported<sup>4, 5</sup>. Fortunately, KOH, as a milder chemical  
209 digestion reagent, could digest biological macromolecules, which ensures the subsequent separation and  
210 detection of PS NPs by AF4-DAD-MALS. Researchers also only recommended these experimental conditions for  
211 efficiently digesting biological tissues with no significant degradation of the microplastics<sup>6</sup>. Although five PS NPs  
212 could be successfully separated from biological matrix using AF4 after alkali digestion, the radius was higher than  
213 its original values, and this difference was gradually reduced with the radii improved, which might be related to  
214 protein corona (Figure S9). We tried to further reduce the protein corona by increasing the KOH concentration  
215 and bathing temperature. Nevertheless, the signal declined with an increase in the concentration of KOH or bath  
216 temperature (Figure S8C and 8D). Therefore, 10 % (*m/v*) KOH and 60 °C were selected to process biological  
217 sample.

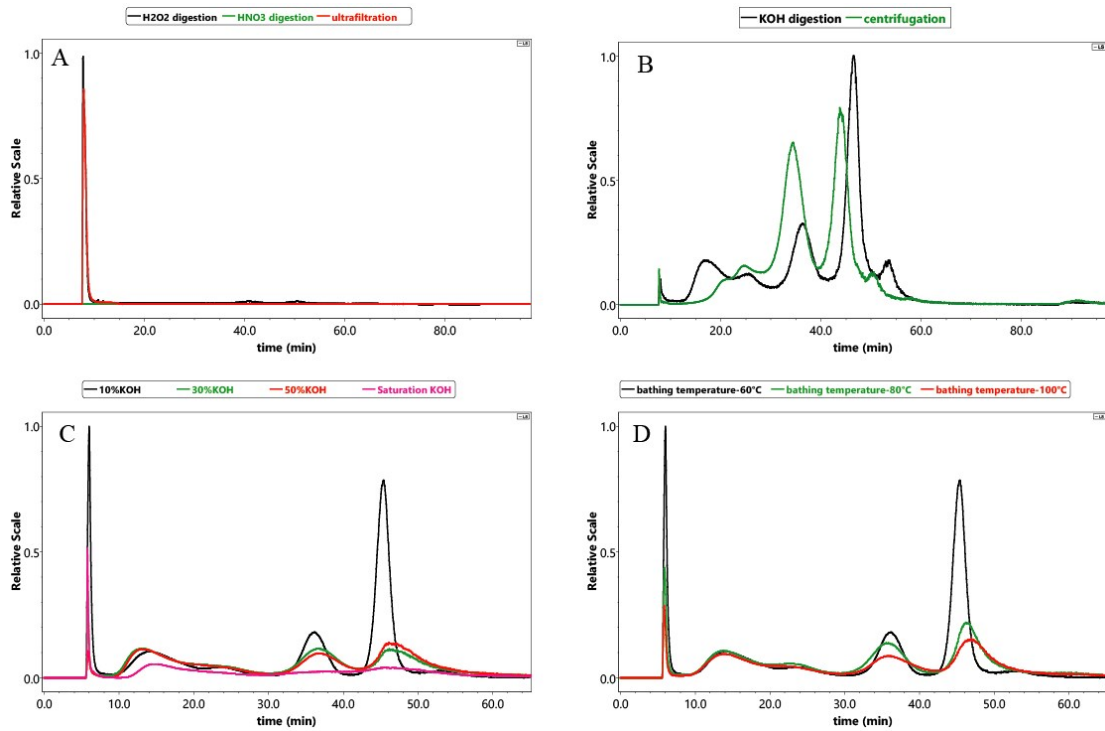

218

219

**Figure S8.** The fractogram of five PS NPs after using various pretreatment methods.

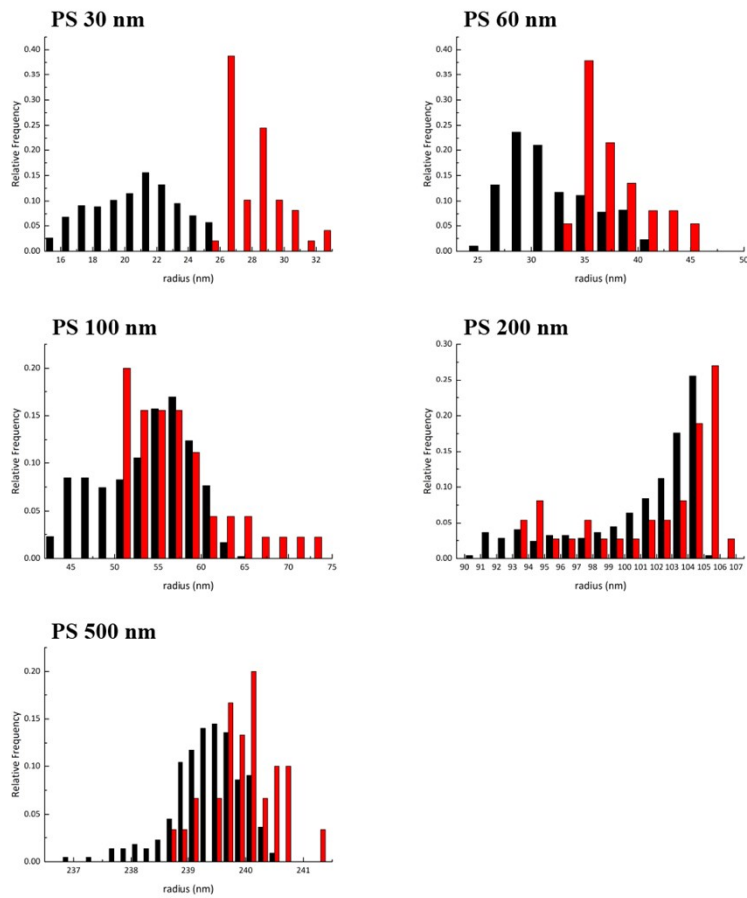

220

221

**Figure S9.** Relative frequency of PS NPs radius obtained on aqueous solution (black) and serum solution (red)

222

224 8. The TEM of PS 100 nm (A) and PS 200 nm (B) separated from blood system of rat after exposure to PS NPs.

225 The AF4-MALS showed the good separation of three PS NPs from the blood system of rat (A). The radius

226 kept constant during the circulation time (B). The mass and total number of PS NPs declined with the time (C and

227 D). The TEM of PS NPs were found to be spherical with uniform distributions, and the radii were close their own

228 actual values (E).

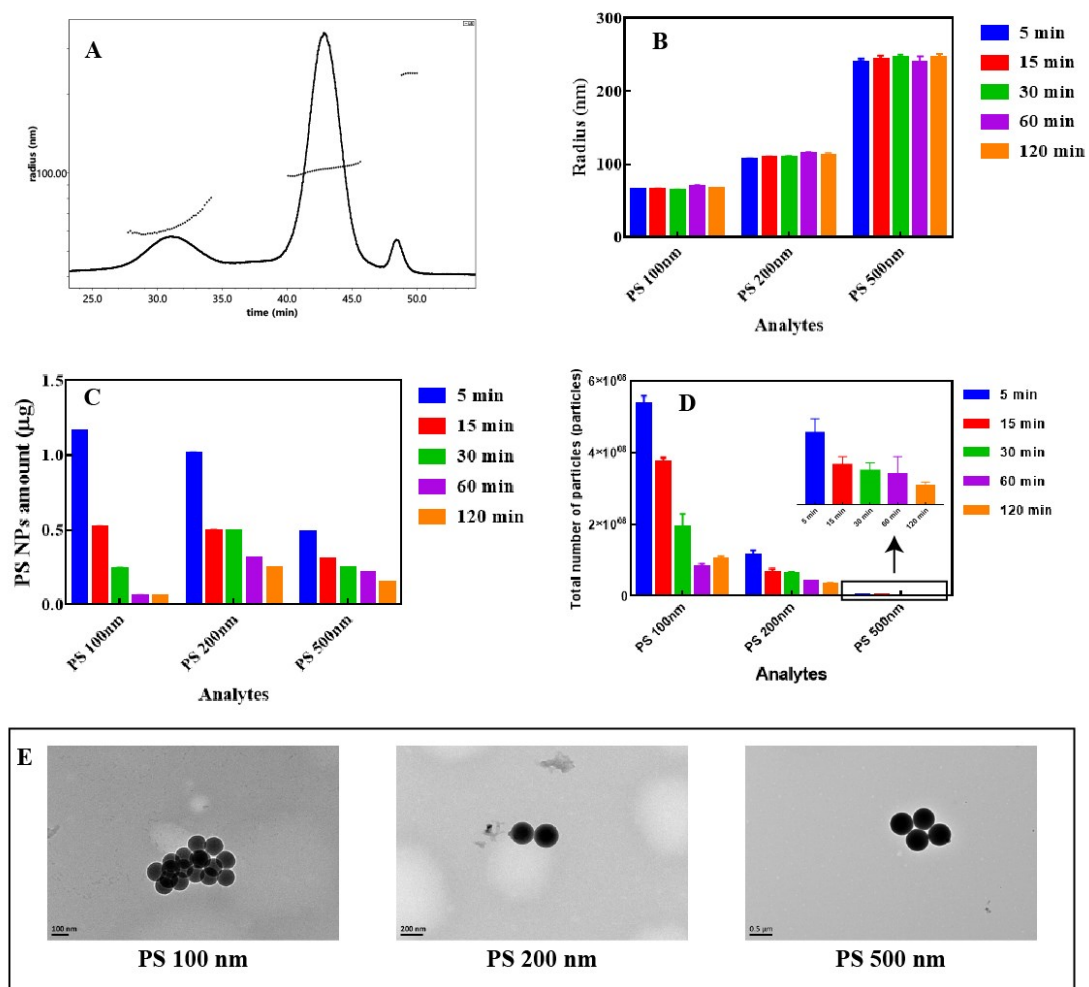

229

230

231

232

**Figure S10.** The application of AF4-DAD-MALS in the whole blood sample

(A The AF4-MALS fractogram of PS NPs; B The radius of PS NPs; C The mass of PS NPs;

D The total number particles of PS NPs; E The TEM of PS NPs)



234 **Tables**

235 **1. The characterization of PS NPs by MALS**

236 The radii of PS 30 nm, PS 60 nm, PS 100 nm, PS 200 nm and PS 500 nm detected by MALS were 19.4 nm,  
 237 29.4 nm, 55.1 nm, 114 nm, 238 nm, respectively. These values were close to the radius supplied by manufacture  
 238 (SD < 4.3 nm). The total number of PS NPs and their values supplied by manufacture were on the same order of  
 239 magnitude. Therefore, MALS could be used to accurately detect the size and number of particles.

**Table S1.** The characterization of PS NPs by MALS

| Analytes | r <sup>a</sup><br>(nm) | r <sub>measure</sub><br>(nm) | SD<br>(nm) | Total number of<br>particles<br>(particles) <sup>a</sup> | Total number of<br>particles <sub>measure</sub><br>(particles) | SD<br>(particles)     |
|----------|------------------------|------------------------------|------------|----------------------------------------------------------|----------------------------------------------------------------|-----------------------|
| PS 30nm  | 14.0                   | 19.4                         | 3.8        | 9.60×10 <sup>11</sup>                                    | 9.02×10 <sup>11</sup>                                          | 4.10×10 <sup>10</sup> |
| PS 60nm  | 27.5                   | 29.4                         | 1.3        | 1.48×10 <sup>10</sup>                                    | 1.23×10 <sup>10</sup>                                          | 1.77×10 <sup>9</sup>  |
| PS 100nm | 49.0                   | 55.1                         | 4.3        | 1.52×10 <sup>9</sup>                                     | 1.18×10 <sup>9</sup>                                           | 2.40×10 <sup>8</sup>  |
| PS 200nm | 100                    | 104                          | 2.8        | 8.00×10 <sup>7</sup>                                     | 8.30×10 <sup>7</sup>                                           | 2.12×10 <sup>6</sup>  |
| PS 500nm | 240                    | 238                          | 1.4        | 6.70×10 <sup>5</sup>                                     | 7.58×10 <sup>5</sup>                                           | 6.22×10 <sup>4</sup>  |

<sup>a</sup> supplied by manufacture

240

242 **2. The optimum eluted program of AF4 for five PS NPs**

243 To be specific, the step 1 and 2 were applied to pre-balance system, step 3 to 5 for separation and elution of  
 244 target analytes, while the last 5 steps were used to wash the channel and injection loop without cross flow. After  
 245 running this program, the next sample could be injected immediately.

**Table S2.** The eluted program of AF4 for five PS NPs

| Step | Mode              | Duration (min) | Cross flow start (mL/min) | Cross flow end (mL/min) | Flow profile |
|------|-------------------|----------------|---------------------------|-------------------------|--------------|
| 1    | elution           | 1              | 1.0                       | 1.0                     | constant     |
| 2    | focus             | 1              | 1.0                       | 1.0                     | constant     |
| 3    | focus injection   | 5              | 1.0                       | 1.0                     | constant     |
| 4    | elution           | 40             | 1.0                       | 0.1                     | linear       |
| 5    | elution           | - <sup>a</sup> | 0.1                       | 0.1                     | constant     |
| 6    | elution injection | 5              | 0                         | 0                       | constant     |
| 7    | focus injection   | 5              | 1.0                       | 1.0                     | constant     |
| 8    | elution injection | 10             | 0                         | 0                       | constant     |
| 9    | focus injection   | 3              | 1.0                       | 1.0                     | constant     |
| 10   | elution injection | 20             | 0                         | 0                       | constant     |

<sup>a</sup> The time of this step depended on the experimental condition.

246

248 **3. The mass and total number particles of PS NPs in biological fluid.**

249 The theoretical numbers of particle and the measured value were on the same order of magnitude for larger  
 250 particles (> 100 nm), while the significant difference could be observed for small particle (PS 30 nm and 60 nm).  
 251 This might be related to the radius of PS 30 nm and 60 nm was far from their respective values because a 2 %  
 252 error in the size presented will result in 6 % error in the number calculated<sup>7</sup>. Consequently, the *RSD* between  
 253 calculated mass and theoretical mass was 21% and 60 % for PS 30 nm and 60 nm, respectively. However, the *RSD*  
 254 was less 11 % for other three particles because their radius and number was close to their respective values,  
 255 meaning that this method still could be used to quantitatively calculate the mass of large particles even in  
 256 biological matrix.

**Table S3.** The mass and total number particles of PS NPs in biological fluid

| Analytes  | $m_{theory}$<br>( $\mu\text{g}$ ) | $m_{calculation}$<br>( $\mu\text{g}$ ) | <i>SD</i><br>( $\mu\text{g}$ ) | Total number<br>of particles <sub>theory</sub> | Total number<br>of particles <sub>measure</sub> | <i>SD</i><br>(particles) |
|-----------|-----------------------------------|----------------------------------------|--------------------------------|------------------------------------------------|-------------------------------------------------|--------------------------|
| PS 30 nm  | 16.4                              | 12.4                                   | 2.83                           | $1.28 \times 10^{11}$                          | $8.61 \times 10^{10}$                           | $2.96 \times 10^{10}$    |
| PS 60 nm  | 2.03                              | 0.81                                   | 0.86                           | $1.97 \times 10^{10}$                          | $5.48 \times 10^9$                              | $1.01 \times 10^{10}$    |
| PS 100 nm | 1.07                              | 0.92                                   | 0.11                           | $2.03 \times 10^9$                             | $1.89 \times 10^9$                              | $9.90 \times 10^7$       |
| PS 200 nm | 0.57                              | 0.56                                   | 0.01                           | $1.07 \times 10^8$                             | $1.19 \times 10^8$                              | $8.49 \times 10^6$       |
| PS 500 nm | 0.57                              | 0.52                                   | 0.04                           | $8.93 \times 10^6$                             | $8.15 \times 10^6$                              | $5.52 \times 10^5$       |

257

259      **References**

- 260 1.      S. T. Kim, K. Rah and S. Lee, *Langmuir the Acs Journal of Surfaces & Colloids*, 2012, **28**, 10672-  
261      10681.
- 262 2.      J. Gigault, J. M. Pettibone, C. Schmitt and V. A. Hackley, *Anal Chim Acta*, 2014, **809**, 9-24.
- 263 3.      X. Jiang, L. Tian, Y. Ma and R. Ji, *Sci Total Environ*, 2019, **655**, 591-597.
- 264 4.      C. G. Avio, S. Gorbi and F. Regoli, *Mar Environ Res*, 2015, **111**, 18-26.
- 265 5.      M. Claessens, L. Van Cauwenberghe, M. B. Vandegheuchte and C. R. Janssen, *Mar Pollut Bull*,  
266      2013, **70**, 227-233.
- 267 6.      A. Dehaut, A.-L. Cassone, L. Frère, L. Hermabessiere, C. Himber, E. Rinnert, G. Rivière, C.  
268      Lambert, P. Soudant, A. Huvet, G. Duflos and I. Paul-Pont, *Environmental Pollution*, 2016, **215**,  
269      223-233.
- 270 7.      W. M. Wyatt PJ, inventors, *US Pat. 6,774,994 B1*, 2004, 1-13.
- 271
